# Supplementary material
Source: PubMed Central journal article supplement (PMC7667998)
Supplement: NIHMS1641937-supplement-Supplemental_Material.pdf [file NIHMS1641937-supplement-Supplemental_Material.pdf]

**Figure S1**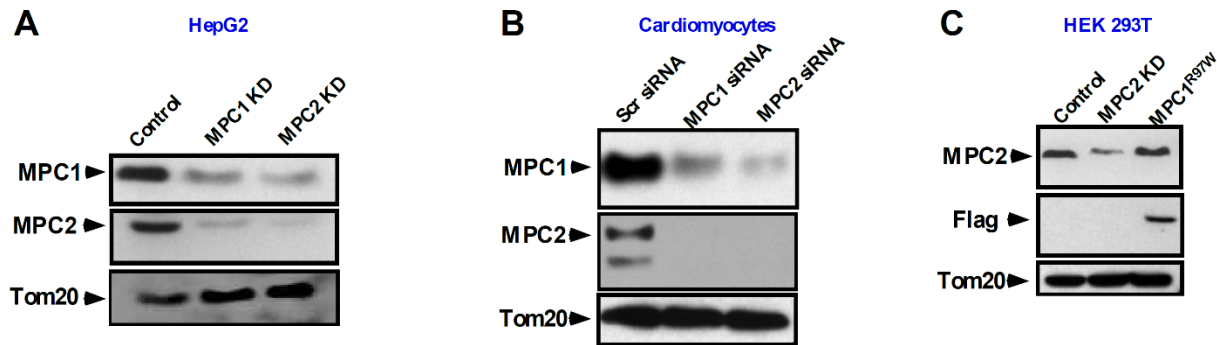**Figure S1: MPC1 and MPC2 abundance following RNAi-mediated knockdown.**

- A) MPC1 and MPC2 expression in HepG2 cells stably expressing either negative shRNA or lentiviral shRNA targeting different regions of *MPC1* and *MPC2* were assessed by Western blot analysis. TOM20 was used as a loading control. n = 3 independent experiments.
- B) MPC1 and MPC2 expression in primary cardiomyocytes transfected with either scrambled siRNA or siRNA targeting different regions of *MPC1* and *MPC2*. 48 hours post transfection cells were collected and were assessed by Western blot analysis. TOM20 was used as a loading control. n = 3 independent experiments.
- C) HEK293T cells stably expressing either negative shRNA or lentiviral shRNA targeting different regions of MPC2 and FLAG-tagged MPC1<sup>R97W</sup> plasmid were assessed by Western blot analysis. TOM20 was used as a loading control. n = 3 independent experiments.

**Figure S2**

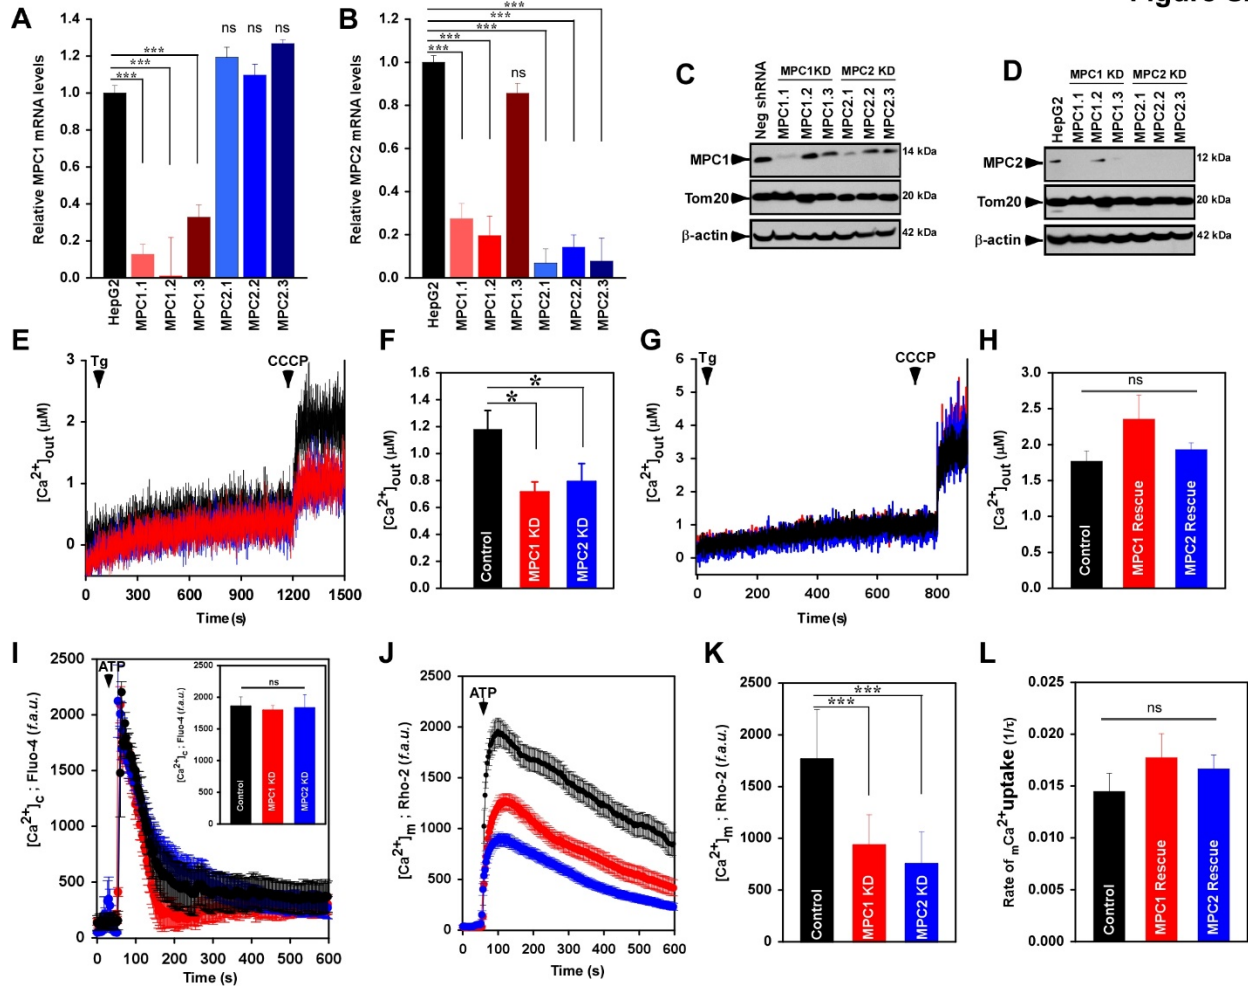

**Figure S2: Silencing MPC alters mitochondrial Ca<sup>2+</sup> uptake in a MICU1-dependent manner.**

A and B) MPC1 and MPC2 expression in HepG2 cells stably expressing either negative shRNA or lentiviral shRNA targeting different regions of *MPC1* and *MPC2* were assessed by qRT-PCR. Data representative of 3-6 independent experiments.

C and D) MPC1 and MPC2 expression in HepG2 cells stably expressing either negative shRNA or lentiviral shRNA targeting different regions of *MPC1* and *MPC2* were assessed by Western blot analysis. Data representative of 3 independent experiments.

E) Representative traces of permeabilized (40 μg/ml digitonin) HepG2 control and MPC KD cells loaded with 2 μM thapsigargin (Tg) ratiometric Ca<sup>2+</sup> indicator Fura2-FF and pulsed with 10 μM CCCP at 1200 s. MPC1 and MPC2 KD showed reduced matrix mitochondrial Ca<sup>2+</sup>.

F) Quantitation of CCCP-induced  $\text{Ca}^{2+}$  release in control and MPC KD HepG2 cells from traces shown in (E). Data represent mean  $\pm$  SEM (n=3 independent experiments), \*P<0.05.

G) Representative traces of permeabilized (40  $\mu\text{g/ml}$  digitonin) HepG2 control and MPC rescue cells loaded with 2  $\mu\text{M}$  thapsigargin (Tg) ratiometric  $\text{Ca}^{2+}$  indicator Fura2-FF and pulsed with 10  $\mu\text{M}$  CCCP at 1200 s.

H) Quantitation of CCCP-induced  $\text{Ca}^{2+}$  release in control and MPC rescue HepG2 cells from traces shown in (G). Data represent mean  $\pm$  SEM (n=3 independent experiments), n.s., not significant.

I) Mean traces of  $\text{cCa}^{2+}$  uptake as measured by Fluo-4 fluorescence in HepG2 WT, MPC1 and MPC2 KD cells upon stimulation with 10 $\mu\text{M}$  ATP. Inset: Quantified peak fluorescence. Data represent mean  $\pm$  SEM (n=4 independent experiments), n.s., not significant

J) Mean traces of  $\text{mCa}^{2+}$  uptake as measured by Rho-2 fluorescence in HepG2 WT, MPC1 KD and MPC2 KD cells upon stimulation with 10 $\mu\text{M}$  ATP.

K) Bar graph presents the peak fluorescence in HepG2 WT, MPC1 KD and MPC2 KD cells upon stimulation with 10 $\mu\text{M}$  ATP from traces shown in (J). Data represent mean  $\pm$  SEM (n=3 independent experiments).

L) Bar graph presents the rate of  $\text{mCa}^{2+}$  uptake in control and MPC rescue HepG2 cells. Data represent mean  $\pm$  SEM (n=3 independent experiments). n.s., not significant.

Figure S3

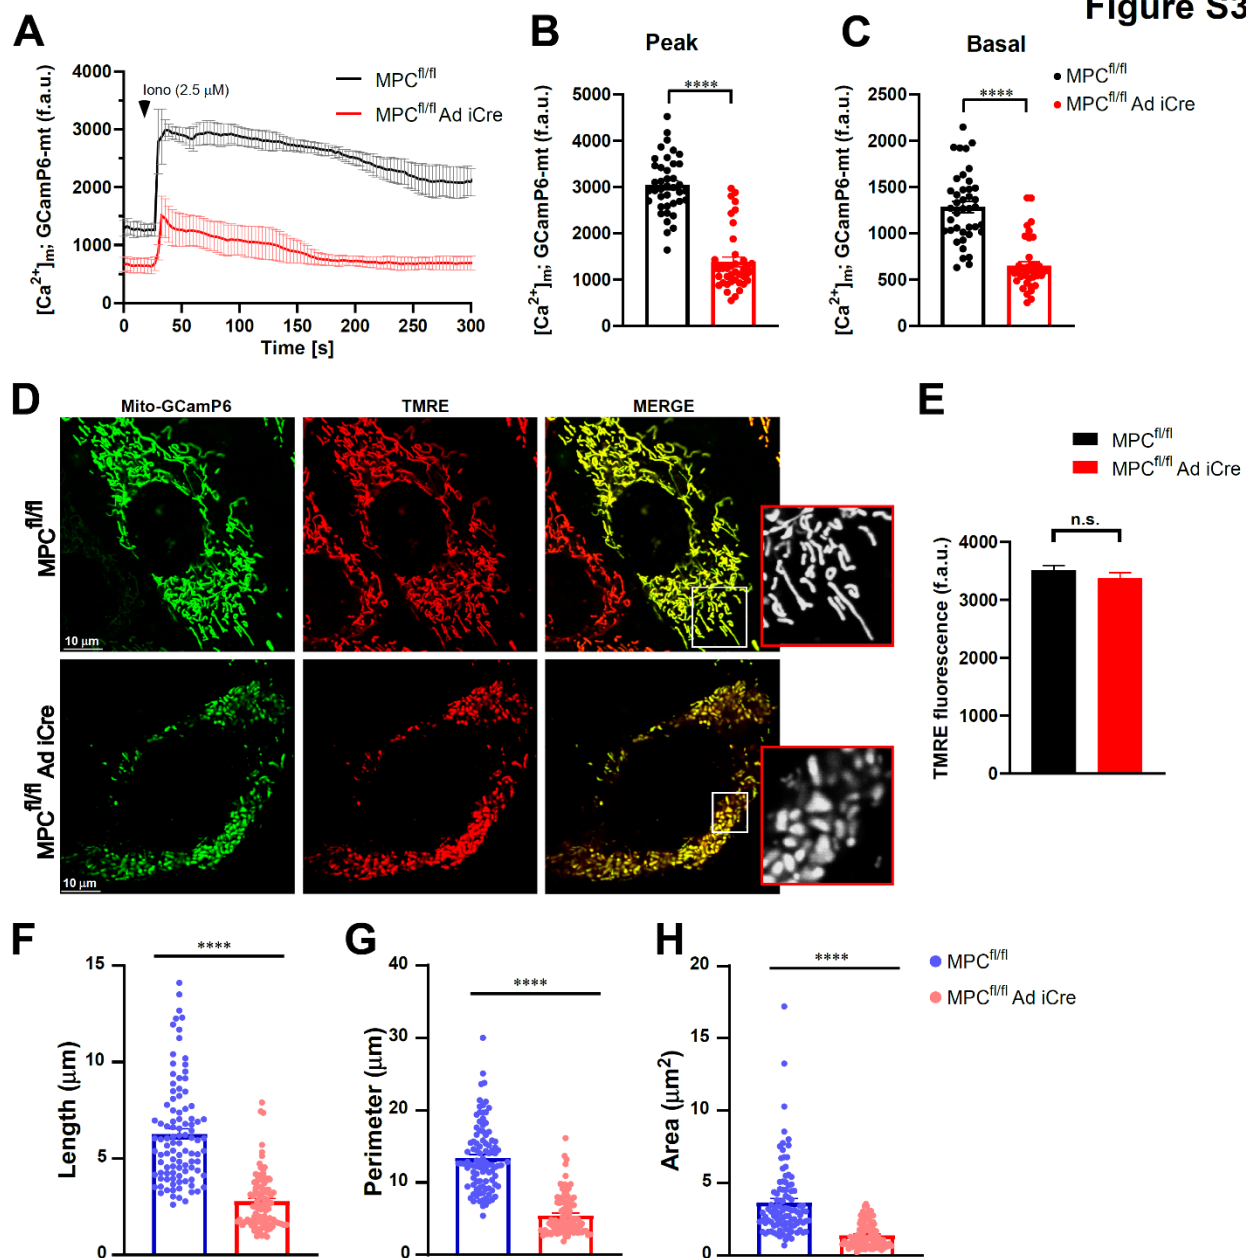

Figure S3. MPC1-deficient MEFs exhibit reduced MCU-mediated mitochondrial Ca<sup>2+</sup> uptake and altered mitochondrial morphology.

A) Mean traces for [Ca<sup>2+</sup>]<sub>m</sub> (GCaMP6-mt) fluorescence measured in MPC1<sup>fl/fl</sup> or MPC1<sup>fl/fl</sup> + Ad iCre MEFs. n = 4 independent experiments.

- B) Quantification of peak mito-GCaMP6 fluorescence after ionomycin (2.5  $\mu$ M) stimulation. Data represent mean  $\pm$  SEM n=4 cells per group, 40 mitochondria per group. \*\*\*\*P<0.0001.
- C) Quantification of basal mito-GCaMP6 fluorescence. Data represent mean  $\pm$  SEM n=4 cells per group, 40 mitochondria per group. \*\*\*\*P<0.0001.
- D) Assessment of MEFs mitochondrial morphology. MEFs were transduced with Ad-iCre virus, then with GCaMP6-*mt* 36 hours later, stained with TMRE 72 hours after transduction of Ad iCre virus, and imaged. Inset (gray scale) shows higher magnification images. n = 4 cells per group.
- E) Quantification of TMRE fluorescence in *MPC1<sup>fl/fl</sup>* and *MPC1<sup>fl/fl</sup>* + Ad iCre hepatocytes. n = 4 cells per group, 15 mitochondria per cell. n.s., not significant.
- F-H) Analyses of mitochondrial length, area, and perimeter. Mean  $\pm$  SEM. n = 4 cells per group, 20 mitochondria per cell. \*\*\*\*P<0.0001.

Figure S4

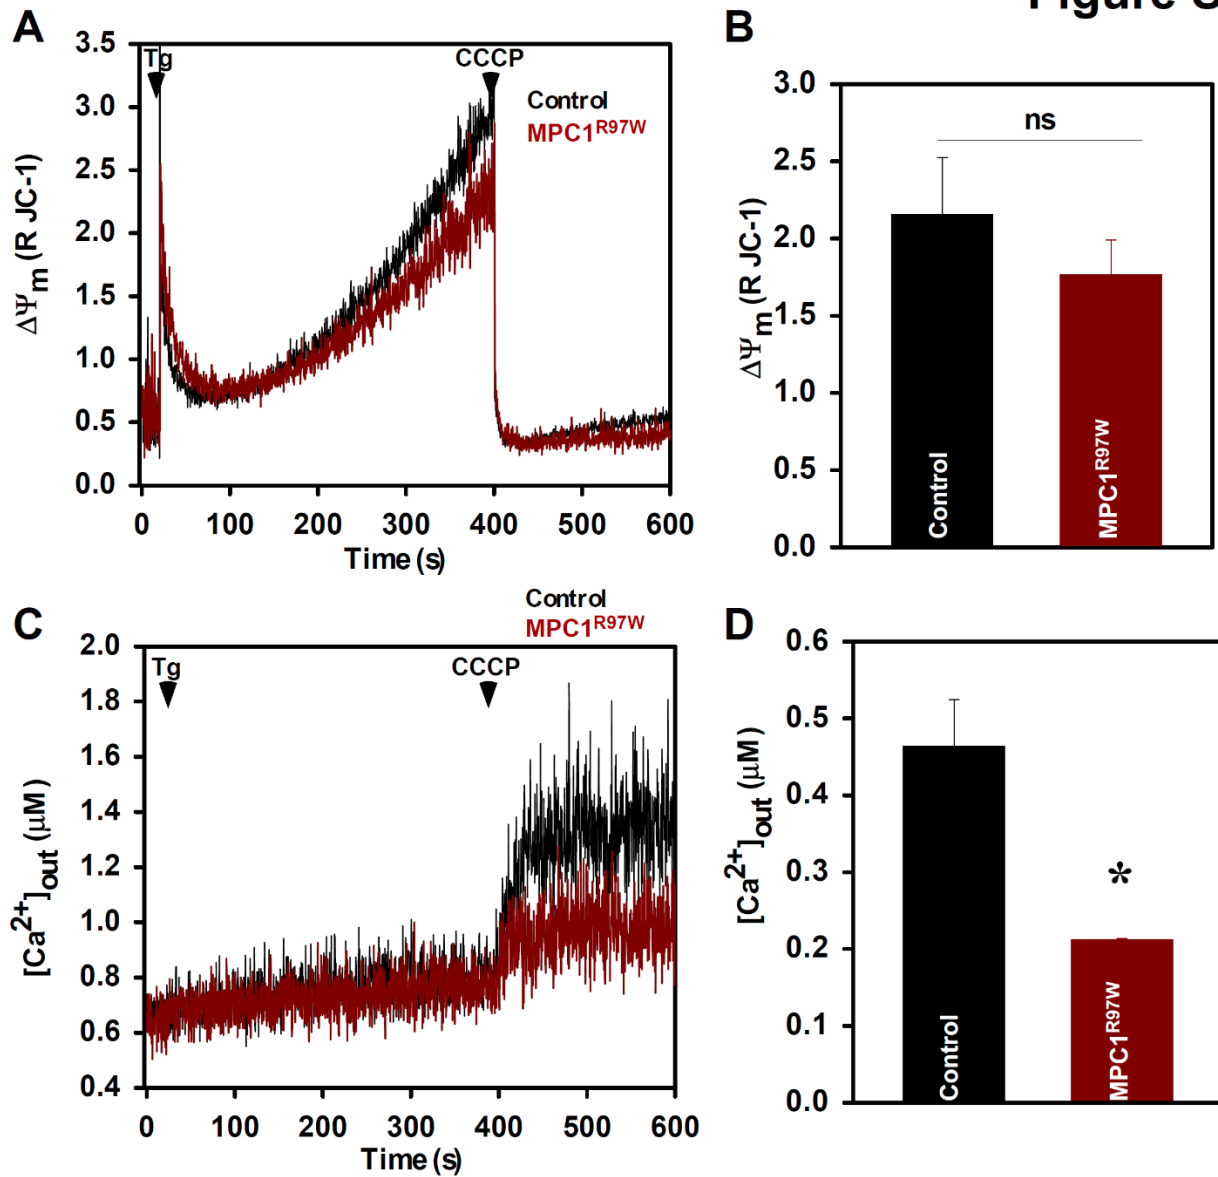

Figure S4: Pyruvate carrier mutations result in decreased matrix Ca<sup>2+</sup> in a MICU1-dependent manner.

A) Representative traces of permeabilized (40 μg/ml digitonin) HepG2 control and MPC1<sup>R97W</sup> cells loaded with 2 μM thapsigargin (Tg), ratiometric ΔΨ<sub>m</sub> fluorophore JC-1 and pulsed with 10 μM uncoupler CCCP at 400 s.

- B) Quantitation of  $\Delta\Psi_m$  before addition of CCCP in control and MPC1<sup>R97W</sup> HepG2 cells from traces in (A). Data represent mean  $\pm$  SEM (n=3 independent experiments), n.s., not significant
- C) Representative traces of permeabilized (40  $\mu$ g/ml digitonin) HepG2 control and MPC1<sup>R97W</sup> cells loaded with 2  $\mu$ M thapsigargin (Tg) ratiometric Ca<sup>2+</sup> indicator Fura2-FF and pulsed with 10  $\mu$ M uncoupler CCCP at 400 s.
- D) Quantitation of CCCP-induced Ca<sup>2+</sup> release in control and MPC1<sup>R97W</sup> HepG2 cells from traces in (C). Data represent mean  $\pm$  SEM (n=3 independent experiments), \*P<0.05.

**Figure S5**

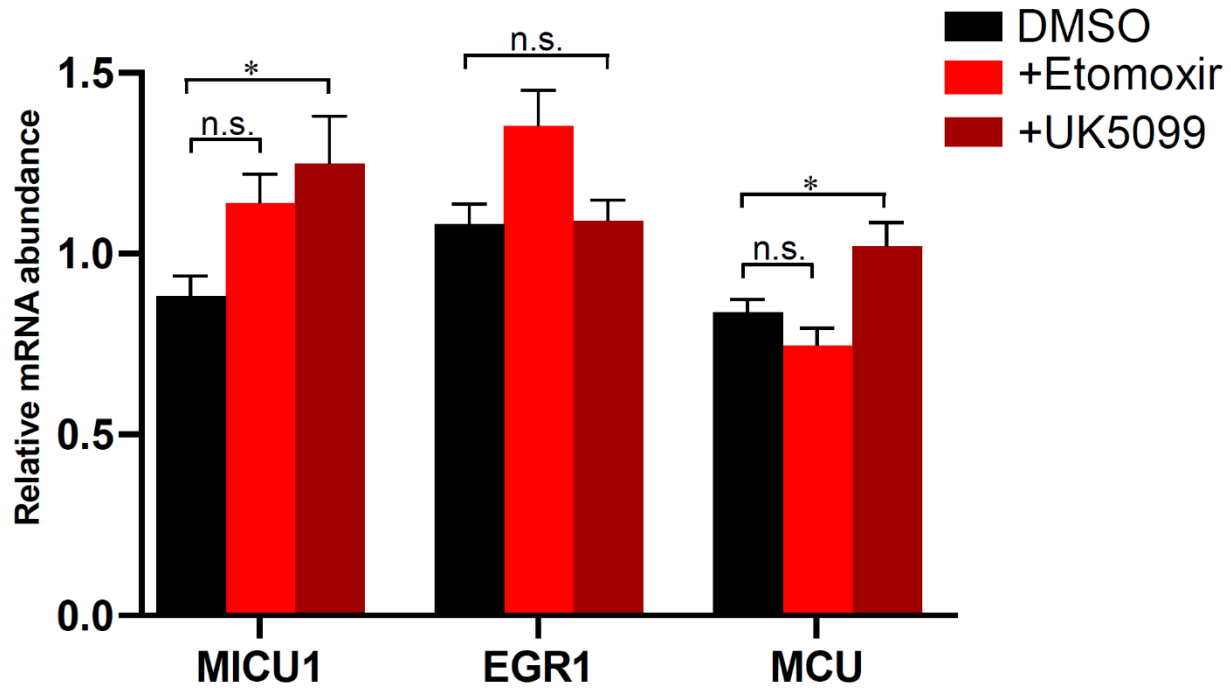

**Figure S5: Pharmacologic blockade of fatty acid and pyruvate flux by etomoxir and UK5099 enhances *MICU1* mRNA abundance.**

WT murine hepatocytes were treated with etomoxir (10  $\mu$ M) or UK5099 (100  $\mu$ M) for 24 hours. Total mRNA was isolated, and RT-qPCR was performed to measure *MICU1*, *EGR1*, and *MCU* mRNA abundance. The relative changes were normalized using  $\beta$ -actin. Data represent mean  $\pm$  SEM from n=3 independent experiments, \*P<0.05, n.s. not significant.
